# Supplementary material for: Thermoelectric properties of Sn-doped p-type Cu3SbSe4: a compound with large effective mass and small band gap
Source: Royal Society of Chemistry journal article supplement (doi:10.1039/c4ta01957a), 2014-01-01
Supplement: c4ta01957a1.pdf [file c4ta01957a1.pdf]

# Thermoelectric properties of Sn doped p-type $\text{Cu}_3\text{SbSe}_4$ : a compound with large effective mass and small band gap

Tian-Ran Wei,<sup>‡a</sup> Heng Wang,<sup>‡b</sup> Zachary M. Gibbs,<sup>b</sup> Chao-Feng Wu,<sup>a</sup> G. Jeffrey Snyder,<sup>b</sup> and Jing-Feng Li<sup>\*a</sup>

*jingfeng@mail.tsinghua.edu.cn*

## 1. XRD patterns

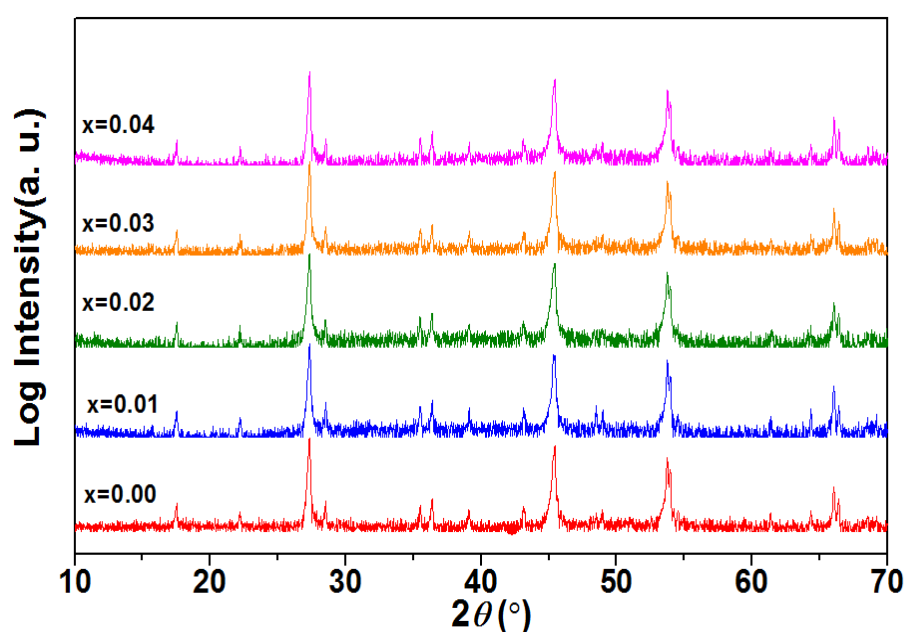

**Fig. S1** Enlarged XRD patterns for  $\text{Cu}_{2.95}\text{Sb}_{1-x}\text{Sn}_x\text{Se}_4$ . No peaks corresponding to secondary phases could be seen.

## 2. Calculation of the Lorenz number by SPB<sup>[1,2]</sup>

In the SPB model and assuming carriers are mostly scattered by acoustic phonons, the Lorenz number is

$$L = \left(\frac{k_B}{e}\right)^2 \frac{3F_0(\eta)F_2(\eta) - 4F_1^2(\eta)}{F_0^2(\eta)}, \quad (\text{S1})$$

where  $F_n(\eta) = \int_0^\infty \frac{x^n dx}{1 + \exp(x - \eta)}$  is the Fermi integrals and  $\eta$  is the reduced chemical potential. Experimentally  $\eta$  is derived from the measured Seebeck coefficient via

$$S = \frac{k_B}{e} \left( \frac{2F_1(\eta)}{F_0(\eta)} - \eta \right) \quad (\text{S2})$$

S and L as functions of  $\eta$  are plotted in Fig. S2 (a). Combining Equations S1 and S2, we can plot the Lorenz number as a function of the measured Seebeck coefficient as demonstrated in Fig. S2 (b).

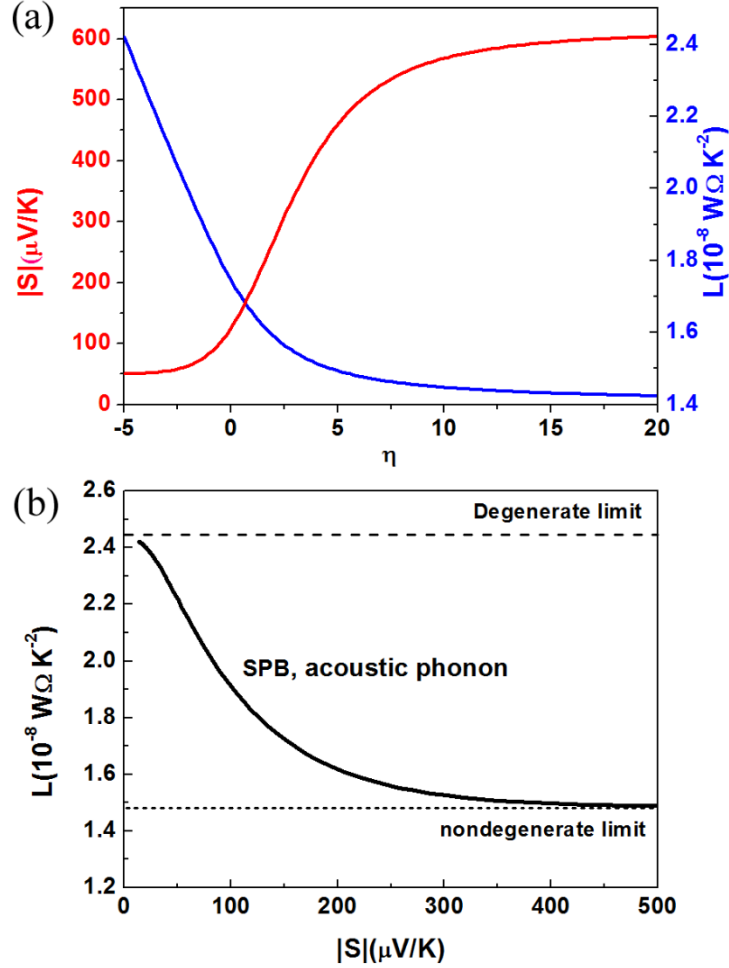

**Fig. S2** Calculation results of Lorenz number in the framework of SPB by assuming acoustic phonon scattering limits carriers' mobility: (a) Seebeck coefficient (red) and Lorenz number (blue) as functions of reduced chemical potential and (b) Lorenz number as a function of Seebeck coefficient.

## References

- [1] G. S. Nolas, J. Sharp and H. J. Goldsmid, *Thermoelectrics: Basic Principles and New Materials Developments*, Springer, Berlin, 2001, pp. 36-42.
- [2] Andrew F. May and G. Jeffrey Snyder, in *Materials, Preparation and Characterization in Thermoelectrics*, ed. D. M. Rowe, CRC press, Boca Raton, 2012, chap. 11, pp. 1-18.
